# Supplementary material for: Mechanistic investigation of sustainable heme-inspired biocatalytic synthesis of cyclopropanes for challenging substrates
Source: Springer Nature journal article supplement (doi:10.1038/s42004-024-01371-4), 2024-11-29
Supplement: MOESM1 [file 42004_2024_1371_MOESM1_ESM.pdf]

*Supplementary Information:*

# Mechanistic Investigation of Sustainable Heme-inspired Biocatalytic Synthesis of Cyclopropanes for Challenging Substrates

*Dongrun Ju, Vrinda Modi, Rahul L. Khade, Yong Zhang\**

Department of Chemistry and Chemical Biology, Stevens Institute of Technology, 1 Castle Point  
Terrace, Hoboken, NJ 07030

## Table of contents

|                                 |                                                                                          |            |
|---------------------------------|------------------------------------------------------------------------------------------|------------|
| <b>Supplementary Note 1.</b>    | <b>Spin state effect</b>                                                                 | <b>S2</b>  |
| <b>Supplementary Note 2.</b>    | <b>Substrate substituent effect</b>                                                      | <b>S4</b>  |
| <b>Supplementary Note 3.</b>    | <b>Axial ligand effect</b>                                                               | <b>S6</b>  |
| <b>Supplementary Note 4.</b>    | <b>Effects of experimentally studied macrocycle<br/>(reactions 7-9)</b>                  | <b>S8</b>  |
| <b>Supplementary Note 5.</b>    | <b>Effects of macrocycles not being experimentally<br/>studied yet (reactions 10-13)</b> | <b>S10</b> |
| <b>Supplementary Note 6.</b>    | <b>Imaginary frequencies of transition states</b>                                        | <b>S13</b> |
| <b>Supplementary references</b> |                                                                                          | <b>S14</b> |

## Supplementary Note 1. Spin state effect

Experimental studies on iron porphyrin carbenes have demonstrated that the most favorable spin state is closed-shell singlet (CSS)<sup>1,2</sup> with Fe<sup>II</sup>-based features, providing accurate predictions of experimental features including Mössbauer, X-ray, and NMR properties, as opposed to Fe<sup>III</sup>-based open-shell singlet (OSS) structures.<sup>1,3</sup> Such a CSS feature is supported by additional experimental XANES studies and high-level multi-reference quantum chemical calculations.<sup>2,4</sup> Therefore, the spin states of the iron-containing reactants (heme carbenes) in all of the studied reactions are CSS. The spin state of the iron-containing His-ligated product was previously determined to be quintet.<sup>5-7</sup> As such, to determine the best spin state for **TS**, both singlet and quintet **TSs** were investigated here for the representative transition states in each studied pathway category as described below, including that of reactions **3**, **6**, **7**, **8**, **10**, and **13**. **TS(3)** was selected to explore the effect of spin under the substrate substituent effect (as opposed to **TS(1, 2)**, which share similar features with each other). Compared to **TS(3)**, **TS(6)** exhibited the largest difference in free energy and geometric and electronic parameters under the axial ligand effect, so this was also investigated. Under the experimentally studied macrocycle effect, **TS(7)** and **TS(8)** were selected as candidates due to their unique geometric interactions in this category. For the computationally studied macrocycles, **TS(10)** and **TS(13)** were selected due to their low free energy barriers and thus, high potential for future experimental applications, with both being  $\sim 0.2$  kcal mol<sup>-1</sup> within each other. Because the previous experimental results show that iron carbene heme catalyst catalyzed cyclopropanation reaction has CSS feature<sup>5,8-10</sup> and the high-level multi-reference quantum chemical calculations showed that the lowest OSS state has a significantly higher  $\Delta E$  of 22.14 kcal mol<sup>-1</sup> than the CSS ground state of a similar heme carbene,<sup>4</sup> only CSS was studied for the singlet. For quintet, we investigated different spin features including A) Fe<sup>II</sup> (S=2) and carbene (S=0), B) ferromagnetically coupled Fe<sup>III</sup> (S=3/2) and carbene (S=1/2), and C) anti-ferromagnetically coupled Fe<sup>III</sup> (S=5/2), carbene (S=-1/2).

As seen from Supplementary Table 1, for **TS(3)**, only two spin features, A and B, were successfully located after geometry optimizations, while the initial spin feature C was optimized to A with Fe<sup>II</sup> (S=2) feature (spin density  $\rho^{\text{Fe}}_{\alpha\beta} = 3.996$  e). Quintet calculations for **TS(6)** are similar with only two spin features, A and B, found after geometry optimizations. For **TS(7)**, although two stable states were finally optimized, one resembles the Fe<sup>II</sup> (S=2) feature A with  $\rho^{\text{Fe}}_{\alpha\beta}$  of 3.956 e, while the other is close to Fe<sup>III</sup> (S=3/2) coupled with radical carbene and substrate of opposite spins based on spin densities of 3.595 e on Fe ( $\rho^{\text{Fe}}_{\alpha\beta}$ ), -0.479 e on carbene's carbon C1, and 0.748 e on substrate (see Supplementary Table 1). For **TS(8)**, all tries ended up with spin feature A after optimizations. **TS(13)** shows the same trend as **TS(8)**. However, for **TS(10)**, all initial setups were optimized with spin feature B: spin densities concentrated on Fe ( $\rho^{\text{Fe}}_{\alpha\beta}$  of 3.264 e) and carbene carbon ( $\rho^{\text{C1}}_{\alpha\beta}$  of 0.446 e). As shown in Supplementary Table 1, although different quintet **TS** results could be obtained with different reactions, all of them are of significantly higher energy than the CSS **TS**, which is consistent with the CSS concerted mechanism found in several experimental heme catalyzed cyclopropanation studies.<sup>5,8-10</sup>

The above-mentioned most favorable spin states were used in the main text discussion.

**Supplementary Table 1.** TS Spin States and their Relative Energies\* (unit:  $kcal\ mol^{-1}$ ) and Spin Densities (unit:  $e$ )

| TS        | S | $\rho_{Fe}$ | $\rho_{C1}$ | $\rho_{C2}$ | $\rho_{C3}$ | $\rho_{R'}$ | $\rho_{Por}$ | $\rho_L$ | $\Delta E$ | $\Delta E_{ZPE}$ | $\Delta H$ | $\Delta G$ |
|-----------|---|-------------|-------------|-------------|-------------|-------------|--------------|----------|------------|------------------|------------|------------|
| <b>3</b>  | 0 | /           | /           | /           | /           | /           | /            | /        | 0.00       | 0.00             | 0.00       | 0.00       |
|           | 2 | 3.996       | -0.345      | 0.111       | -0.167      | -0.024      | 0.351        | 0.041    | 11.38      | 9.67             | 10.28      | 19.68      |
|           | 2 | 3.269       | 0.455       | -0.144      | 0.216       | 0.034       | 0.151        | 0.015    | 15.39      | 12.43            | 13.47      | 7.65       |
| <b>6</b>  | 0 | /           | /           | /           | /           | /           | /            | /        | 0.00       | 0.00             | 0.00       | 0.00       |
|           | 2 | 3.987       | -0.322      | 0.113       | -0.174      | -0.024      | 0.355        | 0.031    | 12.46      | 8.98             | 10.14      | 4.68       |
|           | 2 | 3.319       | 0.423       | -0.135      | 0.199       | 0.031       | 0.145        | 0.013    | 14.21      | 12.27            | 13.12      | 8.76       |
| <b>7</b>  | 0 | /           | /           | /           | /           | /           | /            | /        | 0.00       | 0.00             | 0.00       | 0.00       |
|           | 2 | 3.956       | -0.296      | 0.067       | -0.107      | -0.015      | 0.342        | 0.016    | 15.53      | 12.00            | 13.22      | 8.55       |
|           | 2 | 3.595       | -0.479      | -0.084      | 0.674       | 0.158       | 0.132        | 0.030    | 15.47      | 12.53            | 13.52      | 9.83       |
| <b>8</b>  | 0 | /           | /           | /           | /           | /           | /            | /        | 0.00       | 0.00             | 0.00       | 0.00       |
|           | 2 | 3.980       | -0.342      | 0.074       | -0.110      | -0.016      | 0.338        | 0.038    | 15.01      | 11.76            | 12.63      | 9.42       |
| <b>10</b> | 0 | /           | /           | /           | /           | /           | /            | /        | 0.00       | 0.00             | 0.00       | 0.00       |
|           | 2 | 3.264       | 0.446       | -0.154      | 0.234       | 0.039       | 0.144        | 0.016    | 14.02      | 12.25            | 12.77      | 10.59      |
| <b>13</b> | 0 | /           | /           | /           | /           | /           | /            | /        | 0.00       | 0.00             | 0.00       | 0.00       |
|           | 2 | 3.928       | -0.284      | 0.043       | -0.059      | -0.007      | 0.294        | 0.045    | 17.85      | 14.76            | 15.69      | 11.44      |

\* Energies are relative to CSS species.

## Supplementary Note 2. Substrate substituent effect

**Supplementary Table 2.** Absolute Energies of Species in Cyclopropanation Pathways of Different Olefins (unit: *Hartrees*)

| Reaction              | Species              | E           | E <sub>ZPE</sub> | H           | G           |
|-----------------------|----------------------|-------------|------------------|-------------|-------------|
| <b>1<sup>a)</sup></b> | <b>R<sub>1</sub></b> | -1683.67858 | -1683.20091      | -1683.16901 | -1683.26230 |
|                       | <b>R<sub>2</sub></b> | -309.59817  | -309.46383       | -309.45613  | -309.49592  |
|                       | <b>TS</b>            | -1993.28963 | -1992.67451      | -1992.63575 | -1992.74350 |
|                       | <b>P<sub>1</sub></b> | -1377.27975 | -1376.90283      | -1376.87739 | -1376.95905 |
|                       | <b>P<sub>2</sub></b> | -616.08496  | -615.84844       | -615.83452  | -615.88945  |
| <b>2</b>              | <b>R<sub>2</sub></b> | -314.43944  | -314.21538       | -314.20394  | -314.25200  |
|                       | <b>TS</b>            | -1998.12778 | -1997.42309      | -1997.38038 | -1997.49887 |
|                       | <b>P<sub>2</sub></b> | -620.92923  | -620.60232       | -620.58479  | -620.64811  |
| <b>3</b>              | <b>R<sub>2</sub></b> | -345.75738  | -345.63270       | -345.62389  | -345.66536  |
|                       | <b>TS</b>            | -2029.44078 | -2028.83575      | -2028.79583 | -2028.90676 |
|                       | <b>P<sub>2</sub></b> | -652.24758  | -652.02060       | -652.00542  | -652.06407  |

<sup>a)</sup> All results for X=Ph are from previous work.<sup>5</sup>

**Supplementary Table 3.** Relative Energies of Species in Cyclopropanation Pathways of Different Olefins (unit: *kcal mol<sup>-1</sup>*)

| Reaction | System                             | ΔE     | ΔE <sub>ZPE</sub> | ΔH     | ΔG     |
|----------|------------------------------------|--------|-------------------|--------|--------|
| <b>1</b> | <b>R<sub>1</sub>+R<sub>2</sub></b> | 0.00   | 0.00              | 0.00   | 0.00   |
|          | <b>TS</b>                          | -8.08  | -6.13             | -6.66  | 9.24   |
|          | <b>P<sub>1</sub>+P<sub>2</sub></b> | -55.20 | -54.30            | -54.45 | -56.65 |
| <b>2</b> | <b>R<sub>1</sub>+R<sub>2</sub></b> | 0.00   | 0.00              | 0.00   | 0.00   |
|          | <b>TS</b>                          | -6.13  | -4.27             | -4.66  | 9.68   |
|          | <b>P<sub>1</sub>+P<sub>2</sub></b> | -57.08 | -55.76            | -55.99 | -58.27 |
| <b>3</b> | <b>R<sub>1</sub>+R<sub>2</sub></b> | 0.00   | 0.00              | 0.00   | 0.00   |
|          | <b>TS</b>                          | -3.02  | -1.34             | -1.84  | 13.11  |
|          | <b>P<sub>1</sub>+P<sub>2</sub></b> | -57.34 | -56.36            | -56.42 | -59.90 |

**Supplementary Table 4.** Geometric Parameters of Species in Cyclopropanation Pathways of Different Olefins

| Reaction | System               | R <sub>FeC1</sub><br>(Å) | R <sub>C1C2</sub><br>(Å) | R <sub>C1C3</sub><br>(Å) | R <sub>C2C3</sub><br>(Å) | R <sub>FeL</sub><br>(Å) | ∠ <sub>HClY</sub> <sup>a)</sup><br>(°) |
|----------|----------------------|--------------------------|--------------------------|--------------------------|--------------------------|-------------------------|----------------------------------------|
| <b>1</b> | <b>R<sub>1</sub></b> | 1.755                    | /                        | /                        | /                        | 2.122                   | 113.3                                  |
|          | <b>R<sub>2</sub></b> | /                        | /                        | /                        | 1.331                    | /                       | /                                      |
|          | <b>TS</b>            | 1.863                    | 2.361                    | 2.666                    | 1.345                    | 2.095                   | 109.7                                  |
|          | <b>P<sub>1</sub></b> | /                        | /                        | /                        | /                        | 2.173                   | /                                      |
|          | <b>P<sub>2</sub></b> | /                        | 1.509                    | 1.526                    | 1.496                    | /                       | 112.6                                  |
| <b>2</b> | <b>R<sub>2</sub></b> | /                        | /                        | /                        | 1.328                    | /                       | /                                      |
|          | <b>TS</b>            | 1.869                    | 2.404                    | 2.578                    | 1.341                    | 2.072                   | 109.6                                  |
|          | <b>P<sub>2</sub></b> | /                        | 1.519                    | 1.518                    | 1.490                    | /                       | 112.5                                  |
| <b>3</b> | <b>R<sub>2</sub></b> | /                        | /                        | /                        | 1.327                    | /                       | /                                      |

|                      |       |       |       |       |       |       |
|----------------------|-------|-------|-------|-------|-------|-------|
| <b>TS</b>            | 1.898 | 2.250 | 2.546 | 1.345 | 2.060 | 110.7 |
| <b>P<sub>2</sub></b> | /     | 1.500 | 1.524 | 1.500 | /     | 113.6 |

<sup>a)</sup> H is the hydrogen atom connected to C1; Y is the carbonyl carbon connected to C1.

**Supplementary Table 5.** Atomic Charge of Species in Cyclopropanation Pathways of Different Olefins (unit:  $e$ )

| Reaction System | Q <sub>Fe</sub>      | Q <sub>C1</sub> | Q <sub>H</sub> | Q <sub>Y</sub> | Q <sub>C2</sub> | Q <sub>C3</sub> | Q <sub>R'</sub> <sup>a)</sup> | Q <sub>Por</sub> <sup>b)</sup> | Q <sub>L</sub> |       |
|-----------------|----------------------|-----------------|----------------|----------------|-----------------|-----------------|-------------------------------|--------------------------------|----------------|-------|
| <b>1</b>        | <b>R<sub>1</sub></b> | 0.089           | 0.087          | 0.193          | -0.043          | /               | /                             | /                              | -0.583         | 0.246 |
|                 | <b>R<sub>2</sub></b> | /               | /              | /              | /               | -0.349          | -0.200                        | 0.549                          | /              | /     |
|                 | <b>TS</b>            | 0.144           | -0.055         | 0.199          | -0.032          | -0.337          | -0.146                        | 0.662                          | -0.680         | 0.265 |
|                 | <b>P<sub>1</sub></b> | 1.121           | /              | /              | /               | /               | /                             | /                              | -1.278         | 0.157 |
|                 | <b>P<sub>2</sub></b> | /               | -0.316         | 0.234          | -0.001          | -0.354          | -0.210                        | 0.647                          | /              | /     |
| <b>2</b>        | <b>R<sub>2</sub></b> | /               | /              | /              | /               | -0.386          | -0.168                        | 0.554                          | /              | /     |
|                 | <b>TS</b>            | 0.142           | -0.057         | 0.195          | -0.041          | -0.344          | -0.115                        | 0.650                          | -0.696         | 0.265 |
|                 | <b>P<sub>2</sub></b> | /               | -0.326         | 0.230          | -0.012          | -0.370          | -0.188                        | 0.666                          | /              | /     |
| <b>3</b>        | <b>R<sub>2</sub></b> | /               | /              | /              | /               | -0.267          | -0.318                        | 0.585                          | /              | /     |
|                 | <b>TS</b>            | 0.168           | -0.100         | 0.201          | -0.037          | -0.264          | -0.266                        | 0.689                          | -0.670         | 0.278 |
|                 | <b>P<sub>2</sub></b> | /               | -0.302         | 0.244          | 0.010           | -0.343          | -0.308                        | 0.699                          | /              | /     |

<sup>a)</sup> R' is substrate excluding C2 and C3; <sup>b)</sup> Por is the whole porphyrin with substituent(s).

### Supplementary Note 3. Axial ligand effect

**Supplementary Table 6.** Absolute Energies of Species in Cyclopropanation Pathways of Different Axial Ligands (unit: *Hartrees*)

| Reaction | System               | E           | E <sub>ZPE</sub> | H           | G           |
|----------|----------------------|-------------|------------------|-------------|-------------|
| <b>3</b> | <b>R<sub>1</sub></b> | -1683.67858 | -1683.20091      | -1683.16901 | -1683.26230 |
|          | <b>TS</b>            | -2029.44078 | -2028.83575      | -2028.79583 | -2028.90676 |
|          | <b>P<sub>1</sub></b> | -1377.27975 | -1376.90283      | -1376.87739 | -1376.95905 |
| <b>4</b> | <b>R<sub>1</sub></b> | -1782.91254 | -1782.44281      | -1782.41008 | -1782.50498 |
|          | <b>TS</b>            | -2128.67426 | -2128.07757      | -2128.03667 | -2128.14996 |
|          | <b>P<sub>1</sub></b> | -1476.51585 | -1476.1477       | -1476.12200 | -1476.20458 |
| <b>5</b> | <b>R<sub>1</sub></b> | -2026.51069 | -2026.04851      | -2026.01657 | -2026.11137 |
|          | <b>TS</b>            | -2372.27309 | -2371.68381      | -2371.64370 | -2371.75522 |
|          | <b>P<sub>1</sub></b> | -1720.11225 | -1719.75138      | -1719.72563 | -1719.80920 |
| <b>6</b> | <b>R<sub>1</sub></b> | -1705.72980 | -1705.23462      | -1705.20218 | -1705.29610 |
|          | <b>TS</b>            | -2051.48901 | -2050.86630      | -2050.82570 | -2050.93885 |
|          | <b>P<sub>1</sub></b> | -1399.33140 | -1398.93704      | -1398.91095 | -1398.99377 |

**Supplementary Table 7.** Relative Energies of Species in Cyclopropanation Pathways of Different Axial Ligands (unit: *kcal mol<sup>-1</sup>*)

| Reaction | System                             | $\Delta E$ | $\Delta E_{ZPE}$ | $\Delta H$ | $\Delta G$ |
|----------|------------------------------------|------------|------------------|------------|------------|
| <b>3</b> | <b>R<sub>1</sub>+R<sub>2</sub></b> | 0.00       | 0.00             | 0.00       | 0.00       |
|          | <b>TS</b>                          | -3.02      | -1.34            | -1.84      | 13.11      |
|          | <b>P<sub>1</sub>+P<sub>2</sub></b> | -57.34     | -56.36           | -56.42     | -59.90     |
| <b>4</b> | <b>R<sub>1</sub>+R<sub>2</sub></b> | 0.00       | 0.00             | 0.00       | 0.00       |
|          | <b>TS</b>                          | -2.73      | -1.29            | -1.70      | 12.79      |
|          | <b>P<sub>1</sub>+P<sub>2</sub></b> | -58.68     | -58.25           | -58.64     | -61.69     |
| <b>5</b> | <b>R<sub>1</sub>+R<sub>2</sub></b> | 0.00       | 0.00             | 0.00       | 0.00       |
|          | <b>TS</b>                          | -3.15      | -1.63            | -2.04      | 13.50      |
|          | <b>P<sub>1</sub>+P<sub>2</sub></b> | -57.58     | -56.96           | -56.84     | -60.58     |
| <b>6</b> | <b>R<sub>1</sub>+R<sub>2</sub></b> | 0.00       | 0.00             | 0.00       | 0.00       |
|          | <b>TS</b>                          | -1.15      | 0.64             | 0.23       | 14.19      |
|          | <b>P<sub>1</sub>+P<sub>2</sub></b> | -57.61     | -56.68           | -56.66     | -60.48     |

**Supplementary Table 8.** Geometric Parameters of Species in Cyclopropanation Pathways of Different Axial Ligands

| Reaction | System               | R <sub>FeC1</sub><br>(Å) | R <sub>C1C2</sub><br>(Å) | R <sub>C1C3</sub><br>(Å) | R <sub>C2C3</sub><br>(Å) | R <sub>FeL</sub><br>(Å) | $\angle_{HC1Y}$<br>(°) |
|----------|----------------------|--------------------------|--------------------------|--------------------------|--------------------------|-------------------------|------------------------|
| <b>3</b> | <b>R<sub>1</sub></b> | 1.755                    | /                        | /                        | /                        | 2.122                   | 113.3                  |
|          | <b>TS</b>            | 1.898                    | 2.250                    | 2.546                    | 1.345                    | 2.060                   | 110.7                  |
|          | <b>P<sub>1</sub></b> | /                        | /                        | /                        | /                        | 2.173                   | /                      |
| <b>4</b> | <b>R<sub>1</sub></b> | 1.745                    | /                        | /                        | /                        | 2.196                   | 113.5                  |
|          | <b>TS</b>            | 1.894                    | 2.235                    | 2.529                    | 1.346                    | 2.119                   | 110.5                  |
|          | <b>P<sub>1</sub></b> | /                        | /                        | /                        | /                        | 2.204                   | /                      |

|          |                      |       |       |       |       |       |       |
|----------|----------------------|-------|-------|-------|-------|-------|-------|
| <b>5</b> | <b>R<sub>1</sub></b> | 1.749 | /     | /     | /     | 2.167 | 113.4 |
|          | <b>TS</b>            | 1.896 | 2.244 | 2.541 | 1.345 | 2.090 | 110.6 |
|          | <b>P<sub>1</sub></b> | /     | /     | /     | /     | 2.213 | /     |
| <b>6</b> | <b>R<sub>1</sub></b> | 1.749 | /     | /     | /     | 2.191 | 113.4 |
|          | <b>TS</b>            | 1.902 | 2.232 | 2.536 | 1.346 | 2.143 | 110.1 |
|          | <b>P<sub>1</sub></b> | /     | /     | /     | /     | 2.220 | /     |

**Supplementary Table 9.** Atomic Charge of Species in Cyclopropanation Pathways of Different Axial Ligands (unit: *e*)

| Reaction System | Q <sub>Fe</sub>      | Q <sub>C1</sub> | Q <sub>H</sub> | Q <sub>Y</sub> | Q <sub>C2</sub> | Q <sub>C3</sub> | Q <sub>R'</sub> | Q <sub>Cycle</sub> <sup>a)</sup> | Q <sub>L</sub> |       |
|-----------------|----------------------|-----------------|----------------|----------------|-----------------|-----------------|-----------------|----------------------------------|----------------|-------|
| <b>3</b>        | <b>R<sub>1</sub></b> | 0.089           | 0.087          | 0.193          | -0.032          | /               | /               | /                                | -0.583         | 0.246 |
|                 | <b>TS</b>            | 0.168           | -0.100         | 0.201          | -0.037          | -0.264          | -0.266          | 0.689                            | -0.670         | 0.278 |
|                 | <b>P<sub>1</sub></b> | 1.121           | /              | /              | /               | /               | /               | /                                | -1.278         | 0.157 |
| <b>4</b>        | <b>R<sub>1</sub></b> | 0.089           | 0.093          | 0.194          | -0.027          | /               | /               | /                                | -0.572         | 0.222 |
|                 | <b>TS</b>            | 0.168           | -0.099         | 0.202          | -0.822          | -0.265          | -0.260          | 0.693                            | -0.666         | 0.259 |
|                 | <b>P<sub>1</sub></b> | 1.116           | /              | /              | /               | /               | /               | /                                | -1.271         | 0.155 |
| <b>5</b>        | <b>R<sub>1</sub></b> | 0.097           | 0.097          | 0.194          | -0.026          | /               | /               | /                                | -0.577         | 0.214 |
|                 | <b>TS</b>            | 0.172           | -0.096         | 0.203          | -0.033          | -0.266          | -0.259          | 0.694                            | -0.664         | 0.248 |
|                 | <b>P<sub>1</sub></b> | 1.105           | /              | /              | /               | /               | /               | /                                | -1.250         | 0.145 |
| <b>6</b>        | <b>R<sub>1</sub></b> | 0.097           | 0.093          | 0.194          | -0.026          | /               | /               | /                                | -0.570         | 0.212 |
|                 | <b>TS</b>            | 0.198           | -0.100         | 0.202          | -0.034          | -0.270          | -0.252          | 0.698                            | -0.677         | 0.234 |
|                 | <b>P<sub>1</sub></b> | 1.068           | /              | /              | /               | /               | /               | /                                | -1.211         | 0.143 |

<sup>a)</sup> Cycle is the macrocycle without substituent(s).

**Supplementary Note 4. Effects of experimentally studied macrocycle (reactions 7-9)**

**Supplementary Table 10.** Absolute Energies of Species in Pathways of Reactions 7-9 (unit: *Hartrees*)

| Reaction | System         | E           | E <sub>ZPE</sub> | H           | G           |
|----------|----------------|-------------|------------------|-------------|-------------|
| 7        | R <sub>1</sub> | -2270.90693 | -2270.04962      | -2269.99618 | -2270.13731 |
|          | TS             | -2580.52202 | -2579.52664      | -2579.46691 | -2579.61982 |
|          | P <sub>1</sub> | -1964.50736 | -1963.75040      | -1963.70362 | -1963.83230 |
|          | P <sub>2</sub> | -616.08626  | -615.84955       | -615.83570  | -615.89052  |
| 8        | R <sub>1</sub> | -2273.34679 | -2272.44158      | -2272.38776 | -2272.52691 |
|          | TS             | -2582.96233 | -2581.91970      | -2581.85897 | -2582.01367 |
|          | P <sub>1</sub> | -1966.94695 | -1966.13920      | -1966.09203 | -1966.21919 |
|          | P <sub>2</sub> | -1966.94695 | -1966.13920      | -1966.09203 | -1966.21919 |
| 9        | R <sub>1</sub> | -2273.33680 | -2272.43202      | -2272.37764 | -2272.52019 |
|          | TS             | -2582.95731 | -2581.91385      | -2581.85338 | -2582.00765 |
|          | P <sub>1</sub> | -1966.93561 | -1966.12982      | -1966.08253 | -1966.21136 |

**Supplementary Table 11.** Relative Energies of Species in Pathways of of Reactions 7-9 (unit: *kcal mol<sup>-1</sup>*)

| Reaction | System                         | ΔE     | ΔE <sub>ZPE</sub> | ΔH     | ΔG     |
|----------|--------------------------------|--------|-------------------|--------|--------|
| 7        | R <sub>1</sub> +R <sub>2</sub> | 0.00   | 0.00              | 0.00   | 0.00   |
|          | TS                             | -10.62 | -8.28             | -9.16  | 8.41   |
|          | P <sub>1</sub> +P <sub>2</sub> | -55.55 | -54.28            | -54.60 | -56.23 |
| 8        | R <sub>1</sub> +R <sub>2</sub> | 0.00   | 0.00              | 0.00   | 0.00   |
|          | TS                             | -10.90 | -8.97             | -9.46  | 5.75   |
|          | P <sub>1</sub> +P <sub>2</sub> | -55.38 | -52.30            | -52.60 | -54.52 |
| 9        | R <sub>1</sub> +R <sub>2</sub> | 0.00   | 0.00              | 0.00   | 0.00   |
|          | TS                             | -14.02 | -11.30            | -12.31 | 5.31   |
|          | P <sub>1</sub> +P <sub>2</sub> | -53.71 | -51.71            | -52.26 | -53.15 |

**Supplementary Table 12.** Geometric Parameters of Species in Pathways of Reactions 7-9

| Reaction | System         | R <sub>FeC1</sub><br>(Å) | R <sub>C1C2</sub><br>(Å) | R <sub>C1C3</sub><br>(Å) | R <sub>C2C3</sub><br>(Å) | R <sub>FeL</sub><br>(Å) | ∠ <sub>HC1Y</sub><br>(°) |
|----------|----------------|--------------------------|--------------------------|--------------------------|--------------------------|-------------------------|--------------------------|
| 7        | R <sub>1</sub> | 1.759                    | /                        | /                        | /                        | 2.111                   | 113.0                    |
|          | TS             | 1.862                    | 2.358                    | 2.636                    | 1.345                    | 2.092                   | 110.3                    |
|          | P <sub>1</sub> | /                        | /                        | /                        | /                        | 2.182                   | /                        |
|          | P <sub>2</sub> | /                        | 1.509                    | 1.523                    | 1.495                    | /                       | 115.5                    |
| 8        | R <sub>1</sub> | 1.753                    | /                        | /                        | /                        | 2.132                   | 113.8                    |
|          | TS             | 1.857                    | 2.360                    | 2.664                    | 1.345                    | 2.089                   | 110.1                    |
|          | P <sub>1</sub> | /                        | /                        | /                        | /                        | 2.190                   | /                        |
| 9        | R <sub>1</sub> | 1.750                    | /                        | /                        | /                        | 2.139                   | 113.5                    |
|          | TS             | 1.866                    | 2.330                    | 2.639                    | 1.346                    | 2.075                   | 112.1                    |
|          | P <sub>1</sub> | /                        | /                        | /                        | /                        | 2.199                   | /                        |



**Supplementary Table 13.** Atomic Charge of Species in Pathways of Reactions 7-9 (unit:  $e$ )

| Reaction System | $Q_{Fe}$             | $Q_{C1}$ | $Q_H$  | $Q_Y$ | $Q_{C2}$ | $Q_{C3}$ | $Q_{R'}$ | $Q_{Cycle}$ | $Q_L$  |       |
|-----------------|----------------------|----------|--------|-------|----------|----------|----------|-------------|--------|-------|
| 7               | <b>R<sub>1</sub></b> | 0.095    | 0.083  | 0.192 | -0.032   | /        | /        | /           | -0.588 | 0.251 |
|                 | <b>TS</b>            | 0.152    | -0.061 | 0.201 | -0.044   | -0.328   | -0.153   | 0.659       | -0.684 | 0.259 |
|                 | <b>P<sub>1</sub></b> | 1.120    | /      | /     | /        | /        | /        | /           | -1.273 | 0.153 |
|                 | <b>P<sub>2</sub></b> | /        | -0.320 | 0.233 | -0.003   | -0.350   | -0.208   | 0.647       | /      | /     |
| 8               | <b>R<sub>1</sub></b> | 0.107    | 0.077  | 0.192 | -0.035   | /        | /        | /           | -0.583 | 0.242 |
|                 | <b>TS</b>            | 0.163    | -0.061 | 0.201 | -0.043   | -0.344   | -0.154   | 0.660       | -0.682 | 0.259 |
|                 | <b>P<sub>1</sub></b> | 1.138    | /      | /     | /        | /        | /        | /           | -1.283 | 0.146 |
| 9               | <b>R<sub>1</sub></b> | 0.044    | 0.075  | 0.190 | -0.039   | /        | /        | /           | -0.517 | 0.246 |
|                 | <b>TS</b>            | 0.101    | -0.064 | 0.203 | -0.059   | -0.332   | -0.147   | 0.661       | -0.636 | 0.274 |
|                 | <b>P<sub>1</sub></b> | 1.119    | /      | /     | /        | /        | /        | /           | -1.268 | 0.149 |

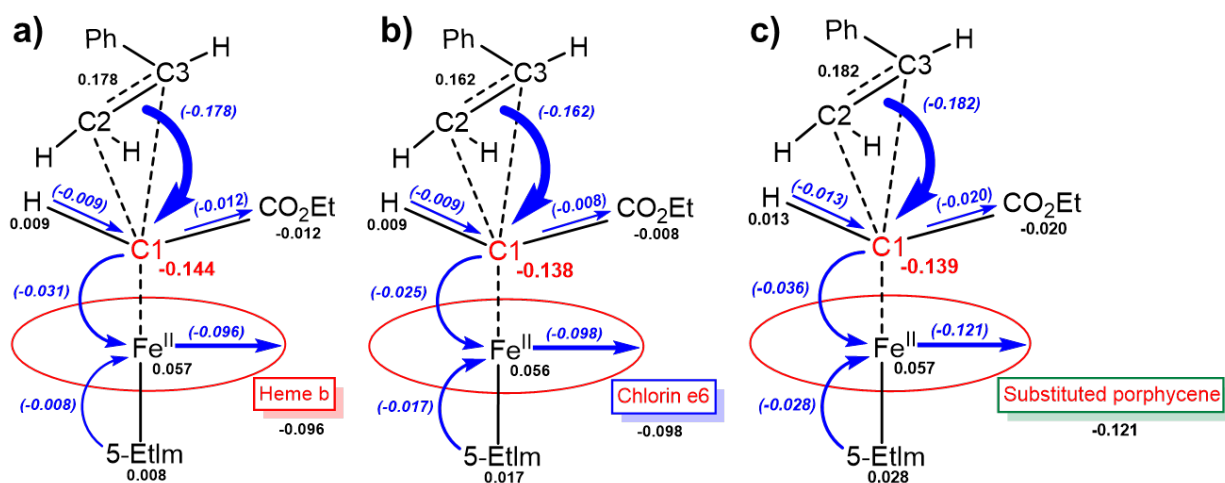**Supplementary Figure 1.** Atomic charge changes from reactants to transition state (in black) and charge transfers (in blue) in reactions 7-9. **a)** reaction 7, **b)** reaction 8, and **c)** reaction 9.

**Supplementary Note 5. Effects of macrocycles not being experimentally studied yet (reactions 10-13)**

**Supplementary Table 14.** Absolute Energies of Species in Pathways of Reactions **10-13** (unit: *Hartrees*)

| Reaction  | System               | E           | E <sub>ZPE</sub> | H           | G           |
|-----------|----------------------|-------------|------------------|-------------|-------------|
| <b>10</b> | <b>R<sub>1</sub></b> | -1684.89448 | -1684.39316      | -1684.36072 | -1684.45464 |
|           | <b>TS</b>            | -2030.65936 | -2030.03149      | -2029.99067 | -2030.10492 |
|           | <b>P<sub>1</sub></b> | -1378.49910 | -1378.09852      | -1378.07226 | -1378.15759 |
| <b>11</b> | <b>R<sub>1</sub></b> | -1683.65514 | -1683.17799      | -1683.14602 | -1683.23970 |
|           | <b>TS</b>            | -2029.41472 | -2028.81013      | -2028.77010 | -2028.88191 |
|           | <b>P<sub>1</sub></b> | -1377.24857 | -1376.87204      | -1376.84644 | -1376.92913 |
| <b>12</b> | <b>R<sub>1</sub></b> | -2362.38104 | -2361.76068      | -2361.71871 | -2361.83434 |
|           | <b>TS</b>            | -2708.14448 | -2707.39671      | -2707.34663 | -2707.48005 |
|           | <b>P<sub>1</sub></b> | -2055.96607 | -2055.44685      | -2055.41140 | -2055.51631 |
| <b>13</b> | <b>R<sub>1</sub></b> | -2052.60782 | -2052.13545      | -2052.09615 | -2052.20666 |
|           | <b>TS</b>            | -2398.37381 | -2397.77492      | -2397.72706 | -2397.85726 |
|           | <b>P<sub>1</sub></b> | -1746.20884 | -1745.83714      | -1745.80435 | -1745.90246 |

**Supplementary Table 15.** Relative Energies of Species in Pathways of Reactions **10-13** (unit: *kcal mol<sup>-1</sup>*)

| Reaction  | System                             | $\Delta E$ | $\Delta E_{ZPE}$ | $\Delta H$ | $\Delta G$ |
|-----------|------------------------------------|------------|------------------|------------|------------|
| <b>10</b> | <b>R<sub>1</sub>+R<sub>2</sub></b> | 0.00       | 0.00             | 0.00       | 0.00       |
|           | <b>TS</b>                          | -4.71      | -3.54            | -3.80      | 9.46       |
|           | <b>P<sub>1</sub>+P<sub>2</sub></b> | -59.50     | -58.53           | -58.40     | -63.79     |
| <b>11</b> | <b>R<sub>1</sub>+R<sub>2</sub></b> | 0.00       | 0.00             | 0.00       | 0.00       |
|           | <b>TS</b>                          | -1.38      | 0.35             | -0.11      | 14.53      |
|           | <b>P<sub>1</sub>+P<sub>2</sub></b> | -52.48     | -51.42           | -51.43     | -55.31     |
| <b>12</b> | <b>R<sub>1</sub>+R<sub>2</sub></b> | 0.00       | 0.00             | 0.00       | 0.00       |
|           | <b>TS</b>                          | -3.80      | -2.09            | -2.53      | 12.33      |
|           | <b>P<sub>1</sub>+P<sub>2</sub></b> | -47.21     | -46.48           | -46.57     | -50.63     |
| <b>13</b> | <b>R<sub>1</sub>+R<sub>2</sub></b> | 0.00       | 0.00             | 0.00       | 0.00       |
|           | <b>TS</b>                          | -5.40      | -4.24            | -4.40      | 9.26       |
|           | <b>P<sub>1</sub>+P<sub>2</sub></b> | -57.24     | -56.22           | -56.30     | -59.30     |

**Supplementary Table 16.** Geometric Parameters of Species in Pathways for Reactions **10-13**

| Reaction  | System               | R <sub>FeC1</sub><br>(Å) | R <sub>C1C2</sub><br>(Å) | R <sub>C1C3</sub><br>(Å) | R <sub>C2C3</sub><br>(Å) | R <sub>FeL</sub><br>(Å) | $\angle_{HC1Y}$<br>(°) |
|-----------|----------------------|--------------------------|--------------------------|--------------------------|--------------------------|-------------------------|------------------------|
| <b>10</b> | <b>R<sub>1</sub></b> | 1.757                    | /                        | /                        | /                        | 2.116                   | 113.4                  |
|           | <b>TS</b>            | 1.895                    | 2.256                    | 2.510                    | 1.346                    | 2.056                   | 110.3                  |
|           | <b>P<sub>1</sub></b> | /                        | /                        | /                        | /                        | 2.173                   | /                      |
| <b>11</b> | <b>R<sub>1</sub></b> | 1.754                    | /                        | /                        | /                        | 2.114                   | 113.6                  |
|           | <b>TS</b>            | 1.898                    | 2.208                    | 2.522                    | 1.347                    | 2.064                   | 111.0                  |
|           | <b>P<sub>1</sub></b> | /                        | /                        | /                        | /                        | 2.151                   | /                      |

|           |                      |       |       |       |       |       |       |
|-----------|----------------------|-------|-------|-------|-------|-------|-------|
| <b>12</b> | <b>R<sub>1</sub></b> | 1.764 | /     | /     | /     | 2.136 | 113.1 |
|           | <b>TS</b>            | 1.901 | 2.305 | 2.524 | 1.343 | 2.075 | 110.7 |
|           | <b>P<sub>1</sub></b> | /     | /     | /     | /     | 2.146 | /     |
| <b>13</b> | <b>R<sub>1</sub></b> | 1.771 | /     | /     | /     | 2.094 | 113.1 |
|           | <b>TS</b>            | 1.893 | 2.356 | 2.572 | 1.341 | 2.056 | 110.7 |
|           | <b>P<sub>1</sub></b> | /     | /     | /     | /     | 2.149 | /     |

**Supplementary Table 17.** Atomic Charge of Species in Pathways for Reactions **10-13** (unit: *e*)

| Reaction System | Q <sub>Fe</sub>      | Q <sub>C1</sub> | Q <sub>H</sub> | Q <sub>Y</sub> | Q <sub>C2</sub> | Q <sub>C3</sub> | Q <sub>R'</sub> | Q <sub>Cycle</sub> | Q <sub>L</sub> |       |
|-----------------|----------------------|-----------------|----------------|----------------|-----------------|-----------------|-----------------|--------------------|----------------|-------|
| <b>10</b>       | <b>R<sub>1</sub></b> | 0.100           | 0.085          | 0.190          | -0.031          | /               | /               | /                  | -0.592         | 0.248 |
|                 | <b>TS</b>            | 0.174           | -0.103         | 0.200          | -0.033          | -0.255          | -0.272          | 0.690              | -0.679         | 0.278 |
|                 | <b>P<sub>1</sub></b> | 1.124           | /              | /              | /               | /               | /               | /                  | -1.280         | 0.155 |
| <b>11</b>       | <b>R<sub>1</sub></b> | 0.029           | 0.090          | 0.192          | -0.036          | /               | /               | /                  | -0.534         | 0.259 |
|                 | <b>TS</b>            | 0.113           | -0.105         | 0.203          | -0.038          | -0.269          | -0.254          | 0.692              | -0.629         | 0.287 |
|                 | <b>P<sub>1</sub></b> | 1.104           | /              | /              | /               | /               | /               | /                  | -1.270         | 0.166 |
| <b>12</b>       | <b>R<sub>1</sub></b> | -0.002          | 0.109          | 0.197          | -0.013          | /               | /               | /                  | -0.550         | 0.259 |
|                 | <b>TS</b>            | 0.058           | -0.067         | 0.202          | -0.023          | -0.262          | -0.250          | 0.701              | -0.649         | 0.290 |
|                 | <b>P<sub>1</sub></b> | 1.093           | /              | /              | /               | /               | /               | /                  | -1.269         | 0.176 |
| <b>13</b>       | <b>R<sub>1</sub></b> | 0.083           | 0.106          | 0.199          | -0.008          | /               | /               | /                  | -0.647         | 0.268 |
|                 | <b>TS</b>            | 0.150           | -0.063         | 0.202          | -0.019          | -0.264          | -0.256          | 0.694              | -0.733         | 0.289 |
|                 | <b>P<sub>1</sub></b> | 1.141           | /              | /              | /               | /               | /               | /                  | -1.311         | 0.170 |

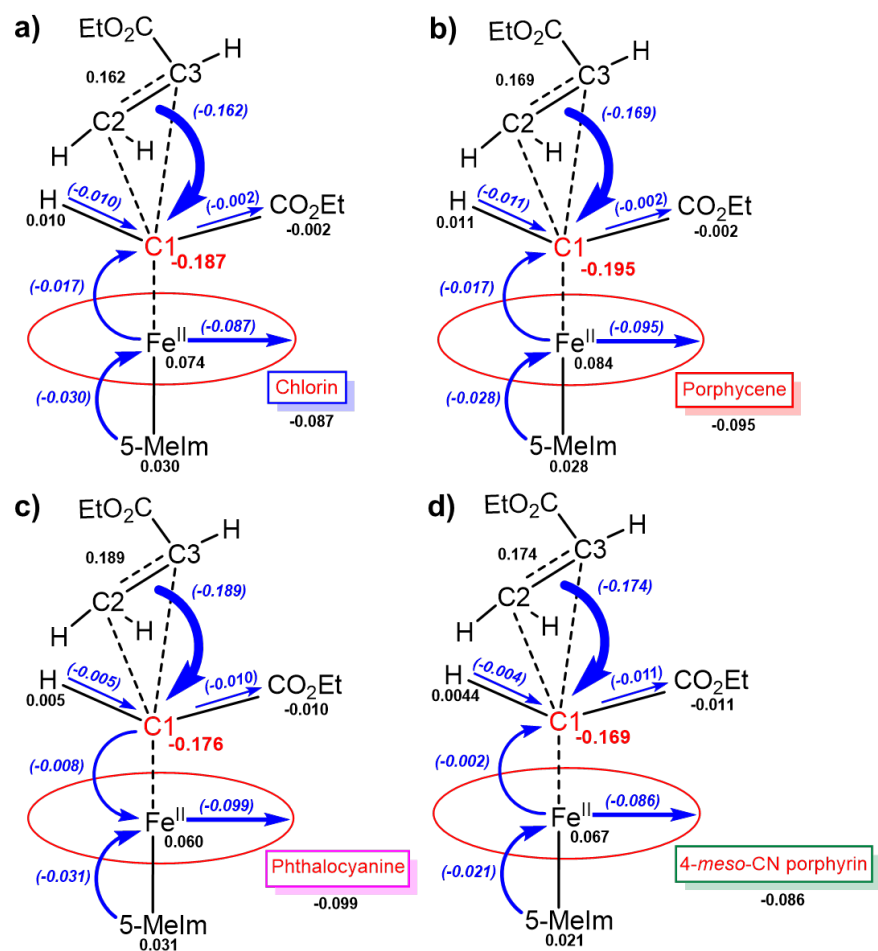

**Supplementary Figure 2.** Atomic charge changes from reactants to transition state (in black) and charge transfers (in blue) in reactions 10-13. **a)** reaction 10, **b)** reaction 11, **c)** reaction 12, and **d)** reaction 13.

**Supplementary Note 6. Imaginary frequencies of transition states**

**Supplementary Table 18.** Imaginary Frequencies of all TSs (unit:  $cm^{-1}$ )

| TS       | Frequency | TS        | Frequency |
|----------|-----------|-----------|-----------|
| <b>1</b> | -218      | <b>8</b>  | -198      |
| <b>2</b> | -191      | <b>9</b>  | -242      |
| <b>3</b> | -296      | <b>10</b> | -296      |
| <b>4</b> | -310      | <b>11</b> | -328      |
| <b>5</b> | -299      | <b>12</b> | -260      |
| <b>6</b> | -310      | <b>13</b> | -215      |
| <b>7</b> | -211      |           |           |

## Supplementary references

- 1 Khade, R. L. *et al.* Iron Porphyrin Carbenes as Catalytic Intermediates: Structures, Mossbauer and NMR Spectroscopic Properties, and Bonding. *Angew. Chem. Int. Ed.* **53**, 7574-7578 (2014).
- 2 Liu, Y. *et al.* Electronic Configuration and Ligand Nature of Five-Coordinate Iron Porphyrin Carbene Complexes: An Experimental Study. *J. Am. Chem. Soc.* **139**, 5023-5026 (2017).
- 3 Khade, R. L. & Zhang, Y. C-H Insertions by Iron Porphyrin Carbene: Basic Mechanism and Origin of Substrate Selectivity. *Chem. Eur. J* **23**, 17654-17658 (2017).
- 4 Strocio, G. D., Srnc, M. & Hadt, R. G. Multireference Ground and Excited State Electronic Structures of Free- versus Iron Porphyrin-Carbenes. *Inorg. Chem.* **59**, 8707-8715 (2020).
- 5 Wei, Y., Tinoco, A., Steck, V., Fasan, R. & Zhang, Y. Cyclopropanations via Heme Carbenes: Basic Mechanism and Effects of Carbene Substituent, Protein Axial Ligand, and Porphyrin Substitution. *J. Am. Chem. Soc.* **140**, 1649-1662 (2018).
- 6 Debrunner, P. G. in *Iron Porphyrins* Vol. 3 (eds A. B. P. Lever & H. B. Gray) 139-234 (VCH Publishers, 1989).
- 7 Khade, R. L. & Zhang, Y. Catalytic and Biocatalytic Iron Porphyrin Carbene Formation: Effects of Binding Mode, Carbene Substituent, Porphyrin Substituent, and Protein Axial Ligand. *J. Am. Chem. Soc.* **137**, 7560-7563 (2015).
- 8 Nam, D. *et al.* Mechanistic manifold in a hemoprotein-catalyzed cyclopropanation reaction with diazoketone. *Nat. Commun.* **14**, 7985 (2023).
- 9 Tinoco, A. *et al.* Origin of high stereocontrol in olefin cyclopropanation catalyzed by an engineered carbene transferase. *ACS Catal.* **9**, 1514-1524 (2019).
- 10 Tinoco, A., Steck, V., Tyagi, V. & Fasan, R. Highly Diastereo- and Enantioselective Synthesis of Trifluoromethyl-Substituted Cyclopropanes via Myoglobin-Catalyzed Transfer of Trifluoromethylcarbene. *J. Am. Chem. Soc.* **139**, 5293-5296 (2017).
